# Supplementary material
Source: PubMed Central journal article supplement (PMC3310938)
Supplement: NIHMS335147-supplement-supplement_1.pdf [file NIHMS335147-supplement-supplement_1.pdf]

TABLE 4. Classification Accuracy of CART Analysis

|              |              | Classification by CART |            |                          |              |              |              | Classification by CART |            |                          |              |
|--------------|--------------|------------------------|------------|--------------------------|--------------|--------------|--------------|------------------------|------------|--------------------------|--------------|
|              |              | Total Cases            | - Late AKI | + Late AKI               | % Correct    |              |              | Total Cases            | - Late AKI | + Late AKI               | % Correct    |
| Actual Class | - Late AKI   | 154                    | 135        | 19                       | 87.66        | Actual Class | - Late AKI   | 52                     | 43         | 9                        | 82.69        |
|              | + Late AKI   | 66                     | 25         | 41                       | 62.12        |              | + Late AKI   | 37                     | 15         | 22                       | 59.46        |
|              | <b>Total</b> | 220                    |            | <b>Overall % Correct</b> | <b>80.00</b> |              | <b>Total</b> | 89                     |            | <b>Overall % Correct</b> | <b>73.03</b> |

**Training Set: Glue Grant**  
**Testing Set: LUMC**

CART, Classification and regression tree; AKI, Acute kidney injury

SUPPLEMENTARY TABLE. Variables in CART analysis

DEMOGRAPHICS

Age  
Sex  
Race

INJURY & RESUSCITATION CHARACTERISTICS

%TBSA  
Burn Mechanism  
Intubated on Admission  
Inhalation Injury  
NROF  
Fraction of predicted Parkland resuscitation  
Early Transfusion  
Early AKI

CO-MORBIDITIES

BMI (kg/m<sup>2</sup>)  
Charlson Score  
Drug Abuse  
Smoker

#### PREADMISSION MEDICATIONS

Number of Medications  
Angiotensin Receptor  
Blocker  
ACE Inhibitor  
Diuretic  
NSAIDs  
Methamphetamine

#### LABORATORY VALUES

Lowest Hematocrit  
Highest K (24 hr)  
Highest Na (24 hr)  
Lowest Na (24 hr)  
Admission Base Deficit  
Worst Base Deficit (24 hr)  
Lowest pH (24 hr)  
Highest glucose (24 hr)  
Lowest glucose (24 hr)

#### VITAL SIGNS

Lowest MAP (24 hr)  
Arrival temperature (°C)  
Lowest temperature (°C) (24 hr)

---

*CART*, Classification and Regression Tree, *%TBSA*, percent total body surface area, *NROF*, non-renal organ failure, *AKI*, acute kidney injury, *BMI*, body mass index, *kg*, kilograms, *m<sup>2</sup>*, meters squared, *ACE*, angiotensin-converting enzyme, *NSAID*, non-steroidal anti-inflammatory drugs, *K*, potassium, *Na*, sodium, *hr*, hour, *MAP*, mean arterial pressure
